# Supplementary material for: Multiple Primary Cancer and Survival after Lumpectomy with or without Radiotherapy for Ductal Carcinoma in Situ: A Propensity- Score-Matching Study
Source: Research Square preprint supplement (doi:10.21203/rs.3.rs-857840/v2), 2021-12-20
Supplement: Supplementary file 1 [file 746cb2341eb836561422aea3.docx]

**Figure s1**. Kaplan-Meier curves of the cumulative hazard of breast cancer specific mortality for DCIS patients (p=0.0004, log-rank test)


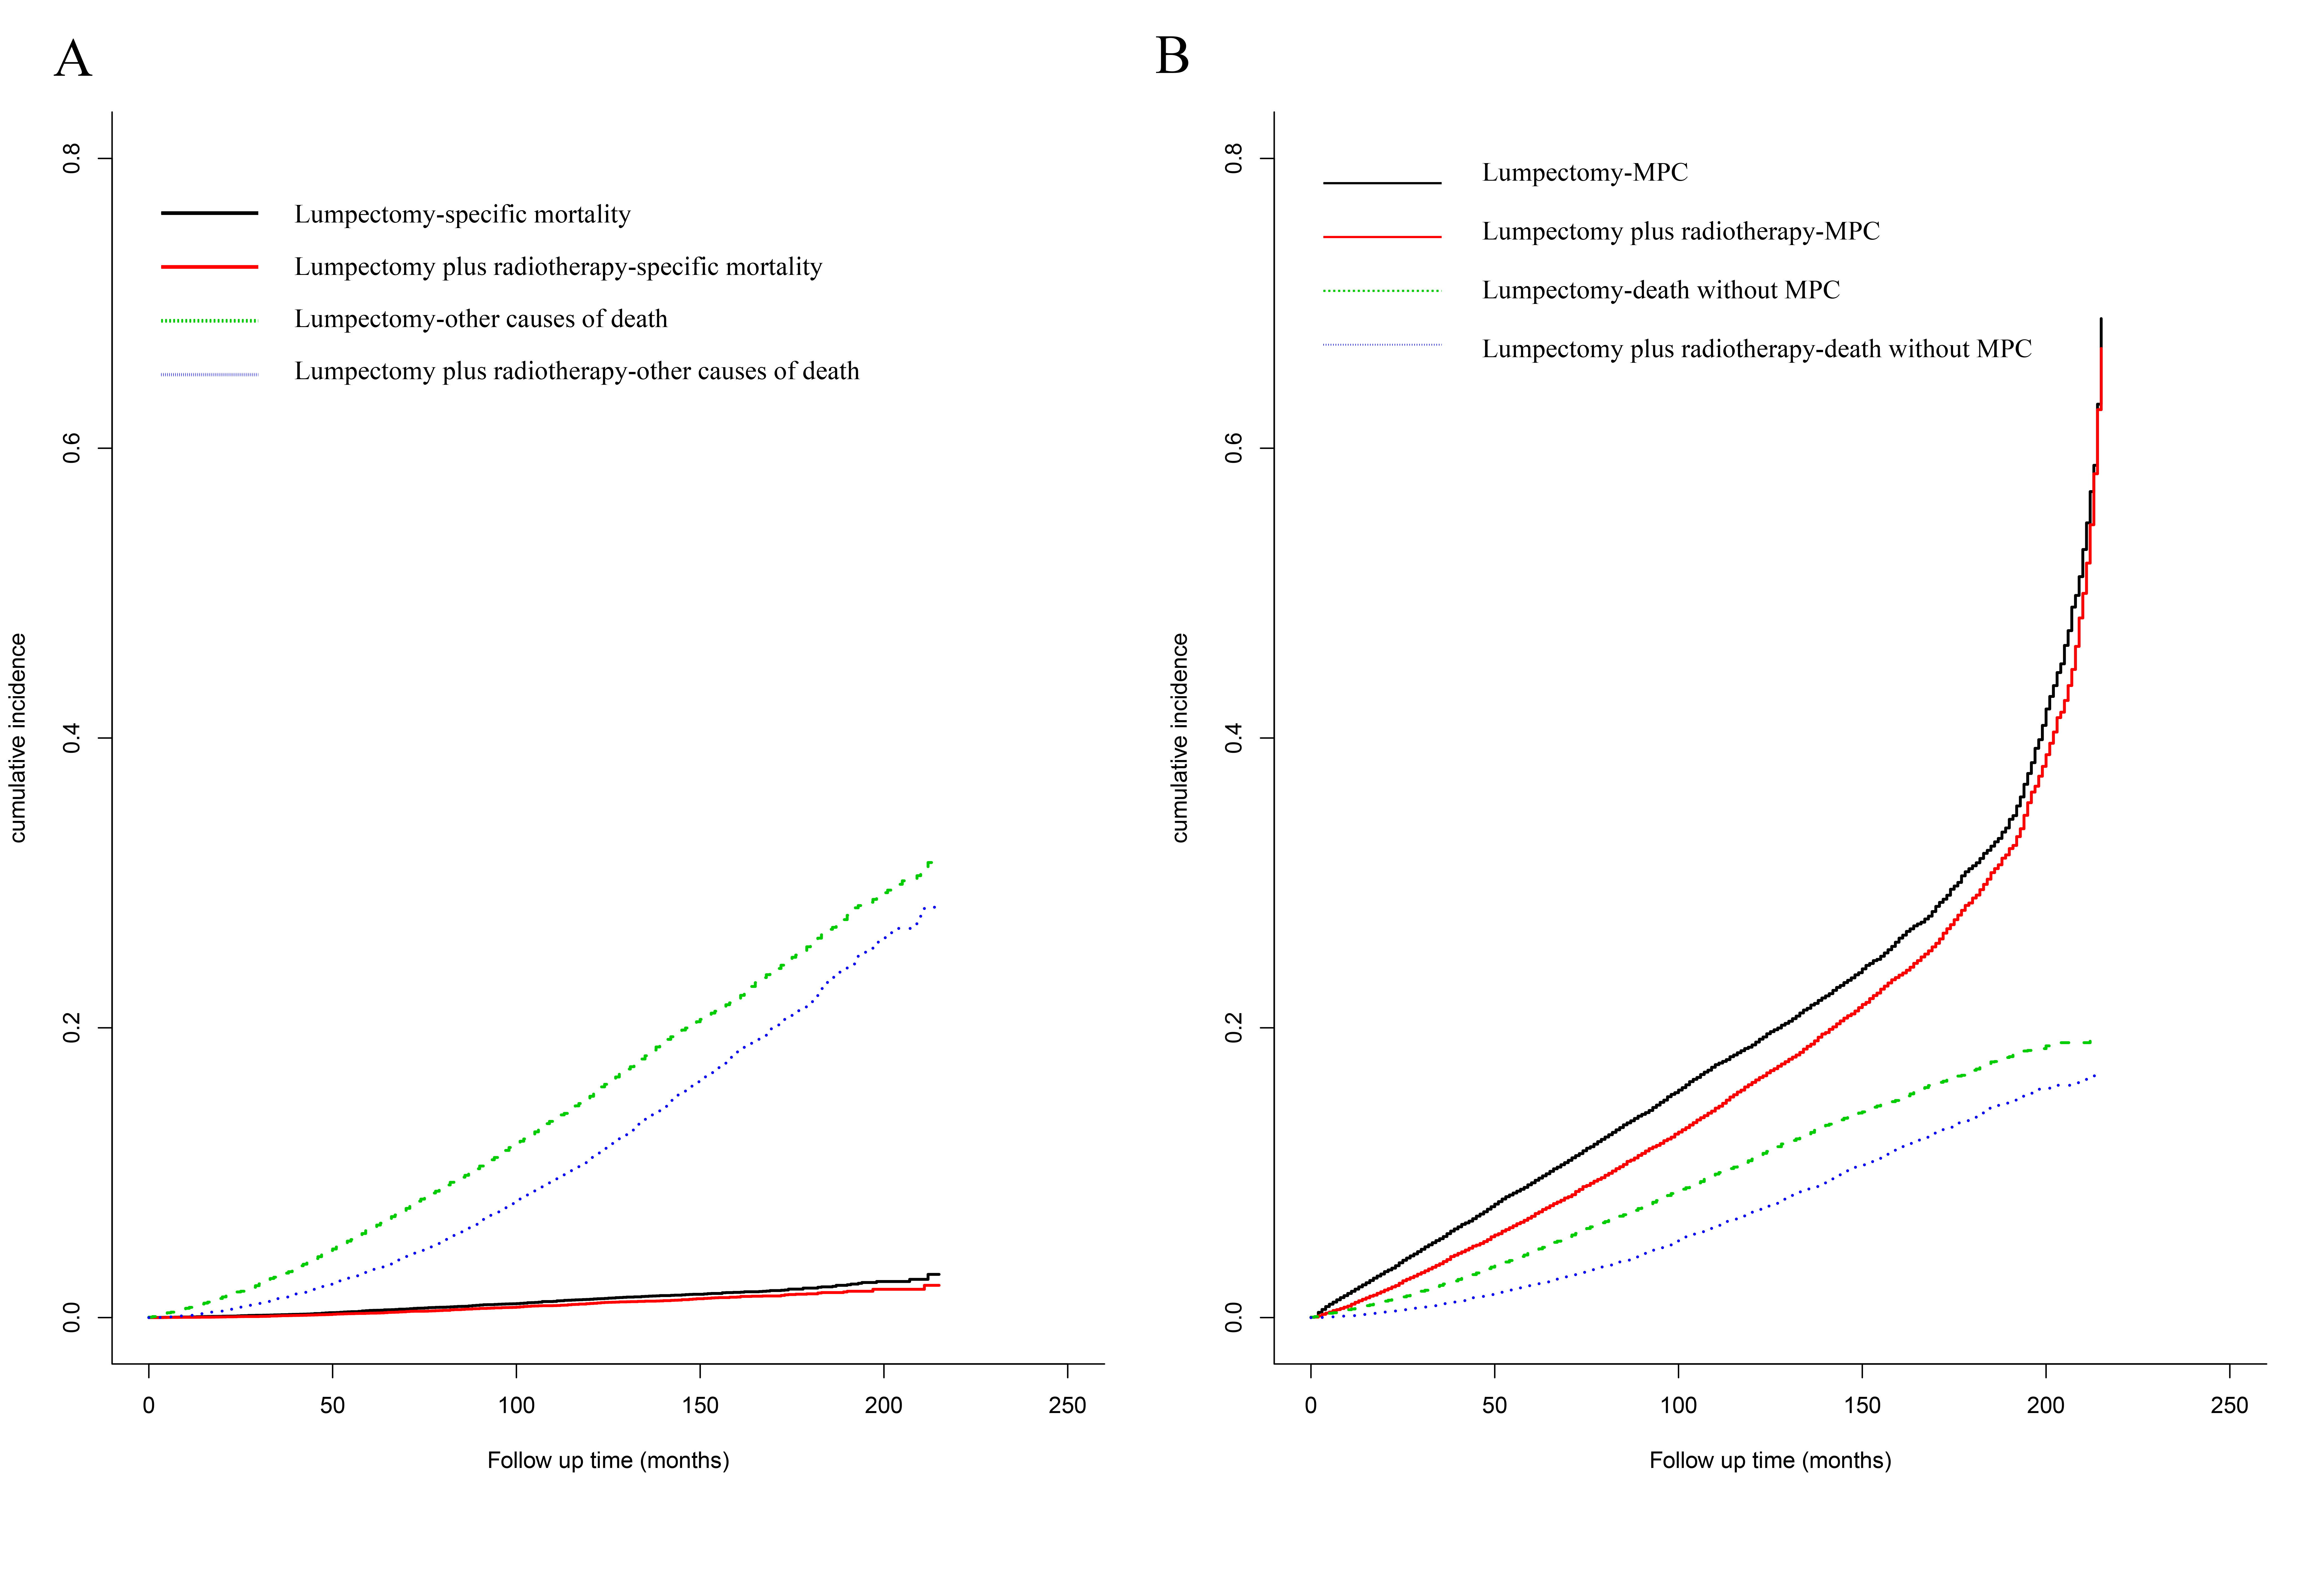


**Figure s2**. Competing risk model of breast cancer specific mortality competing death due to other causes (A) and MPC with competing risk of death without MPC (B). (both *p*<0.0001, Fine and Gray test)
